# Supplementary material for: Glucose-dependent phosphorylation signaling pathways and crosstalk to mitochondrial respiration in insulin secreting cells
Source: PubMed Central journal article supplement (PMC6381748; doi:10.1186/s12964-019-0326-6), 2019-02-20
Supplement: 12964_2019_326_MOESM1_ESM.pdf [file 12964_2019_326_MOESM1_ESM.pdf]

A = Before Stimulation  
 B = Glucose 2.5mM\_5 min  
 C = Glucose 16.7mM\_5min  
 D = Glucose 2.5mM\_30min  
 E = Glucose 16.7mM\_30min  
 F = Glucose 2.5mM\_60min  
 G = Glucose 16.7mM\_60min  
 H = 1uM PMA\_5min  
 I = 1uM PMA\_30min  
 P = Pool (150 µg)

|        | A1      | B1       | C1       | D1       | E1       | F1       | G1       | H1       | I1       | P1      |
|--------|---------|----------|----------|----------|----------|----------|----------|----------|----------|---------|
| Exp. 1 | TMT-126 | TMT-127N | TMT-127C | TMT-128N | TMT-128C | TMT-129N | TMT-129C | TMT-130N | TMT-130C | TMT-131 |
| Exp. 2 | B2      | C2       | D2       | E2       | F2       | G2       | H2       | I2       | A2       | P2      |
|        | TMT-126 | TMT-127N | TMT-127C | TMT-128N | TMT-128C | TMT-129N | TMT-129C | TMT-130N | TMT-130C | TMT-131 |
| Exp. 3 | C3      | A3       | E3       | F3       | G3       | H3       | I3       | B3       | D3       | P3      |
|        | TMT-126 | TMT-127N | TMT-127C | TMT-128N | TMT-128C | TMT-129N | TMT-129C | TMT-130N | TMT-130C | TMT-131 |
| Exp. 4 | D4      | E4       | F4       | A4       | H4       | I4       | C4       | G4       | B4       | P4      |
|        | TMT-126 | TMT-127N | TMT-127C | TMT-128N | TMT-128C | TMT-129N | TMT-129C | TMT-130N | TMT-130C | TMT-131 |
| Exp. 5 | E5      | F5       | G5       | H5       | I5       | B5       | A5       | D5       | C5       | P5      |
|        | TMT-126 | TMT-127N | TMT-127C | TMT-128N | TMT-128C | TMT-129N | TMT-129C | TMT-130N | TMT-130C | TMT-131 |
