# Supplementary material for: Glucose-dependent phosphorylation signaling pathways and crosstalk to mitochondrial respiration in insulin secreting cells
Source: PubMed Central journal article supplement (PMC6381748; doi:10.1186/s12964-019-0326-6), 2019-02-20

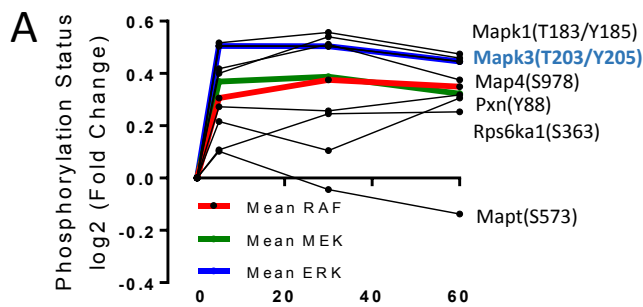

RAF/MEK/ERK Group

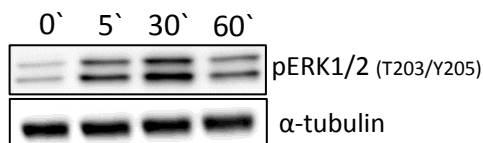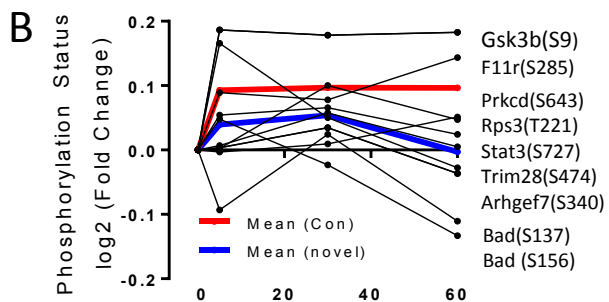

PKC Group

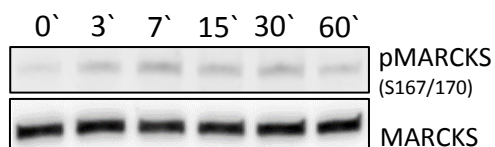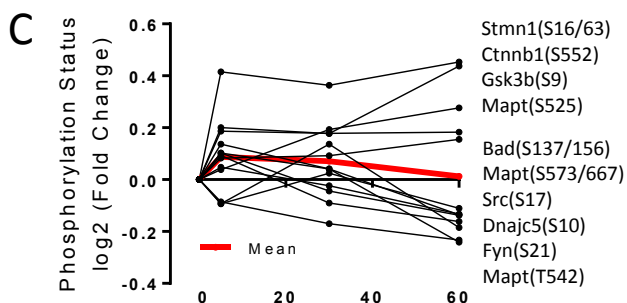

PKA Group

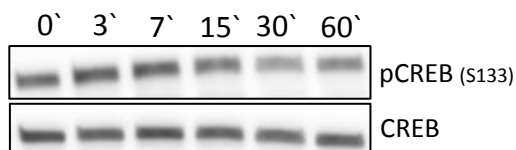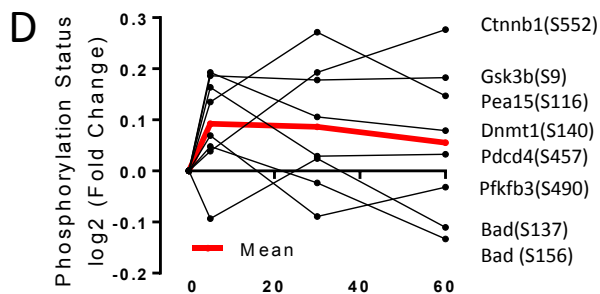

AKT Group

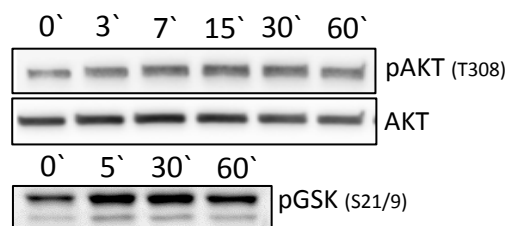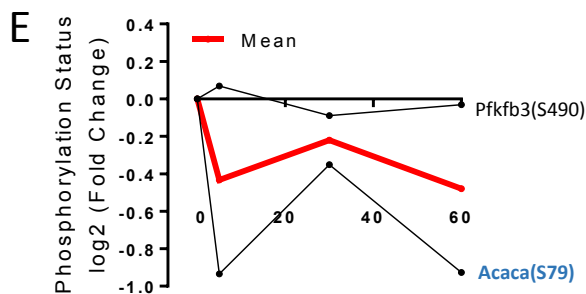

AMPK Group

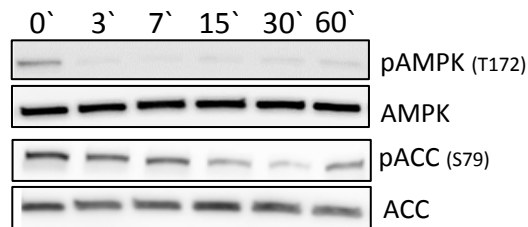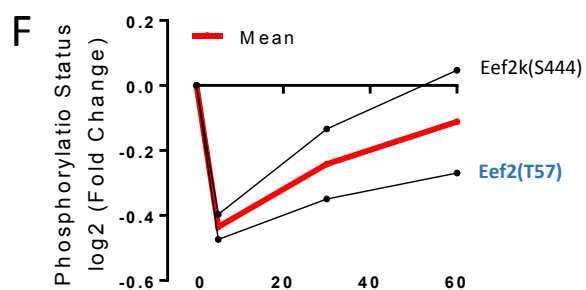

Eef2K Group

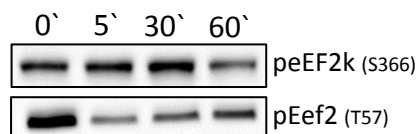

Supplement: 12964_2019_326_MOESM14_ESM.pdf [file 12964_2019_326_MOESM14_ESM.pdf]
