# Supplementary material for: Glucose-dependent phosphorylation signaling pathways and crosstalk to mitochondrial respiration in insulin secreting cells
Source: PubMed Central journal article supplement (PMC6381748; doi:10.1186/s12964-019-0326-6), 2019-02-20
Supplement: 12964_2019_326_MOESM15_ESM.pdf [file 12964_2019_326_MOESM15_ESM.pdf]

Positive KSEA Score upon  
glucose stimulation

| T1 (5min) | T2 (30min)    | T3 (60min)   |
|-----------|---------------|--------------|
| DUSP1     | IRAK1         | CDK5/CDK5R1  |
| DUSP4     | PTK6          | MAPKAPK2     |
| MAP2K2    | EGFR          | PRKCA        |
| MEK1/2    | PTPN1         | MAP3K5       |
| MAP2K1    | CHEK1         | CSNK2B       |
| PTPRE     | PRKG2         | TTBK1        |
| DUSP3     | IL6ST         | CDK19        |
| PTPRJ     | CDK2          | MAPK12       |
| RET       | CDK1          | SIK2         |
| PTPN7     | PAK2          | TTK          |
| PTPRR     | PTK2          | CyclinB/CDK1 |
| LCK       | EEF2K         | ADRBK1       |
| DYRK2     | CyclinE/CDK2  | GSK3B        |
| CAMK4     | SGK1          | PAK1         |
| MARK1     | PRKD2         | PKN1         |
| PRKACA    | CyclinA2/CDK2 |              |
| PRKCB     | MAPK8         |              |
| MAPK13    | AKT3          |              |
| MAPK3     | PRKCD         |              |
| MAPK1     | MAP3K1        |              |
| FLT4      | MAPK14        |              |
| FYN       | NLK           |              |
| SYK       | UHMK1         |              |
| INSR      | MAPK9         |              |
| ERK1/2    |               |              |
| PPP2CA    |               |              |
| AKT       |               |              |
| AKT1      |               |              |
| PPP2CB    |               |              |
| PRKCZ     |               |              |
| SGK3      |               |              |
| MAP4K5    |               |              |
| PRKCH     |               |              |
| PDK1      |               |              |
| PDK3      |               |              |
| PDK4      |               |              |
| PDP1      |               |              |
| PDK2      |               |              |
| CAMK2A    |               |              |
| ATM       |               |              |
| RPS6KA1   |               |              |
| RPS6K     |               |              |
| AKT2      |               |              |
| DYRK1A    |               |              |

Negative KSEA Score  
upon glucose stimulation

| T1 (5min) | T2 (30min) | T3 (60min)  |
|-----------|------------|-------------|
| MAPK7     | GSK3A      | NUAK1       |
| p38       | PHKG1      | PRKCI       |
| AMPK      | CHEK2      | PIM3        |
|           | CSNK1A1    | PIM2        |
|           | CSNK1D     | PIM1        |
|           | BCR        | CSNK2A1     |
|           | PP2B       | CSNK2A2     |
|           | PPP1CB     | PRKACB      |
|           | LRRK2      | PRKCE       |
|           | PPP1CC     | RAF1        |
|           | mTORC1     | RPS6KA2     |
|           |            | PRKD1       |
|           |            | PPP3CA      |
|           |            | Calcineurin |
|           |            | PPP3CB      |
|           |            | PDPK1       |
|           |            | PRKCG       |
|           |            | MTOR        |
|           |            | PPP1CA      |
|           |            | CLK1        |
|           |            | CLK2        |
