# Supplementary material for: Glucose-dependent phosphorylation signaling pathways and crosstalk to mitochondrial respiration in insulin secreting cells
Source: PubMed Central journal article supplement (PMC6381748; doi:10.1186/s12964-019-0326-6), 2019-02-20

**A**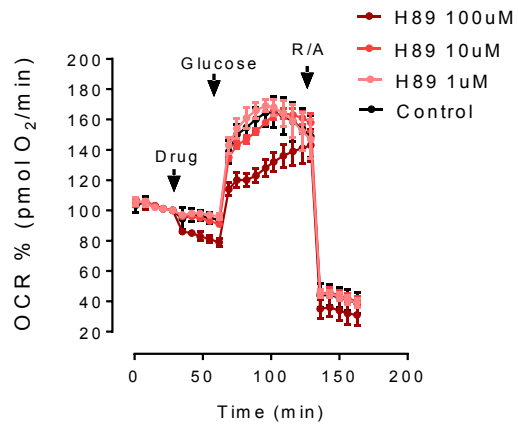**B**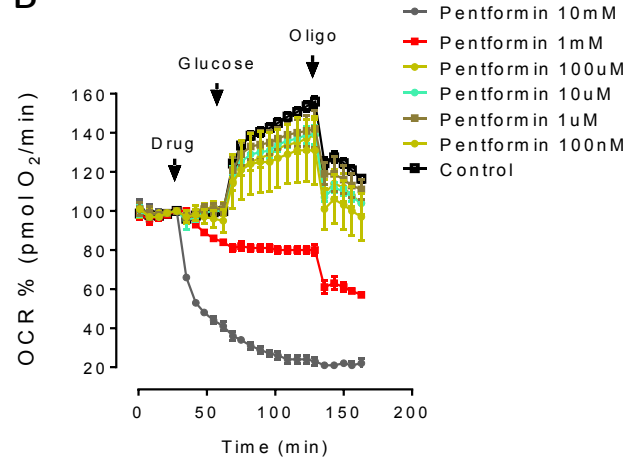

Supplement: 12964_2019_326_MOESM17_ESM.pdf [file 12964_2019_326_MOESM17_ESM.pdf]
